# Supplementary material for: Horizontal gene transfer and the evolution of transcriptional regulation in Escherichia coli
Source: Springer Nature journal article supplement (doi:10.1186/gb-2008-9-1-r4), 2008-01-07
Supplement: Additional file 4 [file gb-2008-9-1-r4-s4.pdf]

## Note S2: Evolutionary ages of paralogous regulatory interactions – are they conserved from a common ancestor?

We analyzed a random sample of the paralogous regulatory interactions reported by Teichmann and Babu (2004).

### TF regulates two paralogous genes

Teichmann and Babu (2004) propose that if a TF regulates two paralogous genes, then this evolved by the duplication of the regulated gene together with its promoter region. We examined 10 examples at random (from “Model 1” in their supplementary material, [http://www.mrc-lmb.cam.ac.uk/genomes/madanm/net\\_evol/ec\\_m1\\_272.txt](http://www.mrc-lmb.cam.ac.uk/genomes/madanm/net_evol/ec_m1_272.txt)) and classified them as follows.

Paralogous genes diverged before the regulatory interaction evolved (6):

- *arcA* → *aceB* & *glcB*: *glcB* was acquired after the divergence of *E. coli* from *Salmonella*, and *glcB* has close relatives in diverse bacteria including Bacilli. *arcA* has evolutionary orthologs only within  $\gamma$ -Proteobacteria (e.g. it has a paralog *torR* within this group). This suggests that *glcB* was acquired from a bacterium that did not contain *arcA* and hence that this regulation evolved after the divergence of *aceB* from *glcB*.
- *arcA* → *cyoC* & *sdhC* & *sdhD*: *sdhC* and *sdhD* are ancient enzymes in the TCA cycle, and hence this divergence presumably predates *arcA*. *cyoC* is also present in diverse organisms.
- *crp* → *rhaA* & *yiaR*: *crp* is unique to Proteobacteria, while *rhaA* and *yiaR* both show recent HGT with other phyla.
- *fis* → *leuP* & many other tRNAs: *fis* is unique to Proteobacteria, and distant relatives in other Proteobacteria have other functions (e.g., *ntnC* in *Rhizobium*). It is possible that some of these regulated tRNAs evolved by duplication (e.g., S. Giroux and R. Cedergren, *J. Bacteriology* 171:6446-54), but presumably most of these tRNAs diverged from each other before the Proteobacteria arose.
- *himA* → *hycG* & *nuoB*: *himA* is well-conserved within Proteobacteria, but it does not have orthologs in most other phyla (e.g., Firmicutes and Cyanobacteria, although these do contain homologous HU-like proteins). Thus, *himA* is ancient, but probably not older than the Proteobacteria. *hycG* is a recent paralog of *hyfI* and their closest relative is from Firmicutes (e.g., *Thermoanaerobacter tengcongensis*), so the *hycG/hyfI* ancestor was probably acquired from bacteria that did not have *himA*.

- narL → fdnI & frdC & frdD: narL is relatively recent HGT within the  $\gamma$ -Proteobacteria, and furthermore is a paralog of narP within  $\gamma$ -Proteobacteria. Only narL is reported to regulate frdABCD, while fdnGHI has sites for both as well as some narL-only sites. frdC and frdD are very distantly related (the homology is not detectable by BLAST and they are assigned to different PFams). frdCD is native to Shewanella and then has homologs in Chromobacterium and Mycobacteria, which do not contain narL/narP, which suggests that its regulation arose after it was acquired.

#### Operon complications (1):

- himA (IHF) → tdcE & pflB: tdcE and pflB are relatively recent paralogs, and IHF is well conserved within Proteobacteria, so this could be an ancestral relationship. However, these genes are in operons with non-paralogous genes, and neither tdcE nor pflB is the first gene in their operon, so this cannot have evolved by simply duplicating a gene together with its promoter region.

#### Unclear (1):

- cysB → cysH & cysM: cysH and cysM are ancient paralogs of each other and also of cysK. cysB has a paralog cbl (also known as metC) within  $\beta, \gamma$ -Proteobacteria, so it is possible that their common ancestor regulated cysH and cysM. However, more distant relatives of cysB are found in diverse bacteria and probably have diverse functions. For example, a subfamily found in Xanthomonas campestris (YP\_241927) and other  $\gamma$ -Proteobacteria has been co-transferred with genes for leucine synthesis. Thus, we doubt whether the regulatory role of cysB/cbl is as old as the divergence of cysH from cysM.

#### Evolution by duplication (1):

- fliA → tarT, tap, tsr. tar/tsr are recent paralogs, and fliA is widely conserved in  $\gamma$ -Proteobacteria.

#### Other (1):

- purR → gcvP: The only paralog of gcvP we identified was rtcB, which is not regulated by purR, so we do not know why this was included in Teichmann & Babu's analysis.

## Paralogous TFs regulate the same gene

Teichmann and Babu (2004) propose that if paralogous TFs regulate the same gene, then this evolved by the duplication of the TF. We examined 10 examples at random (from “Model 2” in their supplementary material, [http://www.mrc-lmb.cam.ac.uk/genomes/madanm/net\\_evolution/ec\\_m2\\_128.txt](http://www.mrc-lmb.cam.ac.uk/genomes/madanm/net_evolution/ec_m2_128.txt)) and classified them as follows.

TF duplication predates acquisition of regulated gene (6):

- *arcA* & *dcuR* → *dctA*: As discussed above, *arcA* is orthologous within  $\gamma$ -Proteobacteria. *dcuR*, which is also known as *yjdG*, is present in Enterobacteria but not in more distantly-related  $\gamma$ -Proteobacteria and seems to have been acquired by HGT, perhaps from Firmicutes.
- *arcA* & *narL* → *nuoL*: *nuoL* is in Enterobacteria but not in other relatives and seems to have been acquired by HGT. Both *arcA* and *narL* have older origins within the  $\gamma$ -Proteobacteria.
- *arcA* & *narL* → *nuoN*: As with *nuoL*, *nuoN* is in Enterobacteria but not in most other relatives.
- *cbl* & *cysB* → *tauD*: *cysB* and *cbl* are paralogs within the  $\beta, \gamma$ -Proteobacteria, while *tauD* is present in Enterobacteria such as *Yersinia* but not in more distant  $\gamma$ -Proteobacteria.
- *crp* & *fnr* → *ansB*: *ansB* was acquired by HGT, probably after the divergence of *E. coli* from *Vibrio* species, and has close homologs in other phyla, while *crp* and *fnr* are ancient native genes within Proteobacteria.
- *lysR* & *tdcA* → *tdcA*: *lysR* has a complex history of HGT, as does *tdcA*, and these genes are distantly related.

Unclear (4):

- *crp* & *fnr* → *sucA*: Both regulators and the regulated gene are ancient native genes within Proteobacteria, so it is hard to determine if the duplication predates the regulation or not.
- *crp* & *fnr* → *sucB*: Both regulators and the regulated gene are ancient native genes within Proteobacteria, so it is hard to determine if the duplication predates the regulation or not.
- *crp* & *fnr* → *tdcA*: The regulation of *tdcA* by *fnr* seems to be indirect (Chattopadhyay et al., J. Bacteriol. 179:4868-73). In any case, *crp* and *fnr* are ancient paralogs and are both highly conserved within  $\gamma$ -Proteobacteria. *tdcA* is a recent paralog of *ydaK* and has a complex history of HGT before that. Because many of these homologs are in  $\beta, \gamma$ -Proteobacteria, we cannot rule out the possibility that *tdcA* was regulated by *crp* and *fnr* before the acquisition.
- *crp* & *fnr* → *tdcG*: *tdcG* is in the same operon as *tdcA* and has the same history.

## Paralogous TFs regulate paralogous genes

Teichmann and Babu (2004) propose that if paralogous TFs regulate paralogous genes, then this evolved by the duplication of both the TF and the regulated genes. We examined 10 examples at random (taken from “Model 3” in their supplementary material, [http://www.mrc-lmb.cam.ac.uk/genomes/madanm/net\\_evol/ec\\_m3\\_74.txt](http://www.mrc-lmb.cam.ac.uk/genomes/madanm/net_evol/ec_m3_74.txt)) and classified them as follows.

Autoregulation of distantly-related TFs (4):

- $\text{arsR} \rightarrow \text{arsR} \ \& \ \text{marR} \rightarrow \text{marR}$ .
- $\text{betI} \rightarrow \text{betI} \ \& \ \text{uidR} \rightarrow \text{uidR}$ .
- $\text{asnC} \rightarrow \text{asnC} \ \& \ \text{lrp} \rightarrow \text{lrp}$ .
- $\text{gals} \rightarrow \text{gals} \ \& \ \text{idnR} \rightarrow \text{idnR}$ .

(Because auto-regulation is common for all types of transcription factors, it is not surprising that distantly-related pairs of TFs are found in which both members of the pair regulate their own transcription. Hence, there is no reason to expect that this reflects conserved regulation from a common ancestor.)

Unclear (2):

- $\text{evgA} \rightarrow \text{ompC} \ \& \ \text{ompR} \rightarrow \text{fadL}, \text{ompC}, \text{ompF} \ \& \ \text{phoB} \rightarrow \text{phoE}$  : These two-component systems have different functions and have closer paralogs:  $\text{evgA}$  has closer paralogs  $\text{bglJ}$ ,  $\text{dctR}$ , and  $\text{rcsA}$ ;  $\text{phoB}$  has closer paralogs  $\text{baeR}$  and  $\text{creB}$ ;  $\text{ompR}$  has closer paralogs  $\text{cpxR}$  and  $\text{torR}$ . This suggests that the regulatory cross-talk between these two-component systems arose after the duplication events.
- $\text{fur} \rightarrow \text{fepC} \ \& \ \text{fhuC} \ \& \ \text{zur} \rightarrow \text{znuC}$ . ( $\text{zur}$  is also known as  $\text{yjbK}$  and  $\text{znuC}$  is also known as  $\text{yebM}$ .)  $\text{zur}$  and  $\text{fur}$  are ancient paralogs.  $\text{fepC}$ ,  $\text{znuC}$ , and  $\text{fhuC}$  all show evidence for recent HGT. However, because  $\text{zur}$  is adjacent to  $\text{znuC}$  in some distant bacteria, it is possible that the two have co-evolved and have been co-transferred since the divergence.

Other (4):

- $\text{gcvA} \rightarrow \text{gcvP}$ : We did not find regulatory relationships between paralogs for  $\text{gcvA}$  ( $\text{cbl}$ ,  $\text{cynR}$ ,  $\text{cysB}$ ,  $\text{dsdC}$ ,  $\text{hcaR}$ ,  $\text{ilvY}$ ,  $\text{lysR}$ ,  $\text{metR}$ ,  $\text{nac}$ ,  $\text{nhaR}$ ,  $\text{oxyR}$ ,  $\text{tdcA}$ ,  $\text{xapR}$ ) and  $\text{gcvP}$  ( $\text{rtcB}$ ), so we do not know why this was included in Teichmann & Babu’s analysis.

- $\text{marR} \rightarrow \text{nfo}$ : We did not find regulatory relationships between paralogs for  $\text{marR}$  ( $\text{arsR}, \text{gatR}_2$ ) and  $\text{nfo}$  ( $\text{rhaA}, \text{uxuA}, \text{xylA}, \text{yiaR}$ ), so we do not know why this was included in Teichmann & Babu's analysis.
- $\text{metR} \rightarrow \text{glyA}$ : We did not find regulatory relationships between paralogs for  $\text{metR}$  ( $\text{cbl}, \text{cynR}, \text{cysB}, \text{dsdC}, \text{gcvA}, \text{hcaR}, \text{ilvY}, \text{lysR}, \text{nac}, \text{nhaR}, \text{oxyR}, \text{tdcA}, \text{xapR}$ ) and  $\text{glyA}$  ( $\text{argD}, \text{bioA}, \text{bioF}, \text{metC}, \text{kbl}, \text{malY}, \text{tnaA}, \text{tyrB}$ ), so we do not know why this was included in Teichmann & Babu's analysis.
- $\text{yiaJ} \rightarrow \text{yiaQ}$ : We did not find any regulatory relationships between paralogs for  $\text{yiaJ}$  ( $\text{iclR}, \text{mhpR}$ ) and  $\text{yiaQ}$  ( $\text{trpC}$ ), so we do not know why this was included in Teichmann & Babu's analysis.
